# Supplementary material for: Biodegradable FeWOx nanoparticles for CT/MR imaging-guided synergistic photothermal, photodynamic, and chemodynamic therapy
Source: Royal Society of Chemistry journal article supplement (doi:10.1039/d0nr07215j), 2020-12-22
Supplement: d0nr07215j1.pdf [file d0nr07215j1.pdf]

## Supporting Information

### Biodegradable FeWO<sub>x</sub> Nanoparticles for CT/MR Imaging-Guided Synergistic Photothermal, Photodynamic and Chemodynamic Therapy

Yaru Cheng,<sup>‡ a, b, §</sup> Huiting Lu,<sup>‡ c, §</sup> Fan Yang,<sup>a, b</sup> Yiyi Zhang,<sup>a, b</sup> Haifeng Dong<sup>a, b, \*</sup>

<sup>a</sup>Research Center for Bioengineering and Sensing Technology, School of Chemistry and Bioengineering, University of Science & Technology Beijing, 30 Xueyuan Road, Beijing 100083, P. R. China

<sup>b</sup>Beijing Advanced Innovation Center for Materials Genome Engineering, University of Science and Technology Beijing, Beijing 100083, P.R. China

<sup>c</sup>Department of Chemistry, School of Chemistry and Bioengineering, University of Science and Technology Beijing, 30 Xueyuan Road, Beijing 100083, P. R. China

<sup>§</sup> Both authors contributed equally to this work.

\*Email: [hfdong@ustu.edu.cn](mailto:hfdong@ustu.edu.cn)

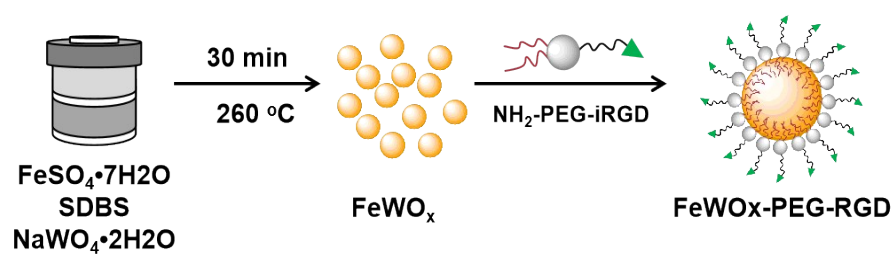

**Figure S1.** A scheme of the synthesis process of  $\text{FeWO}_x\text{-PEG-RGD}$  NPs.

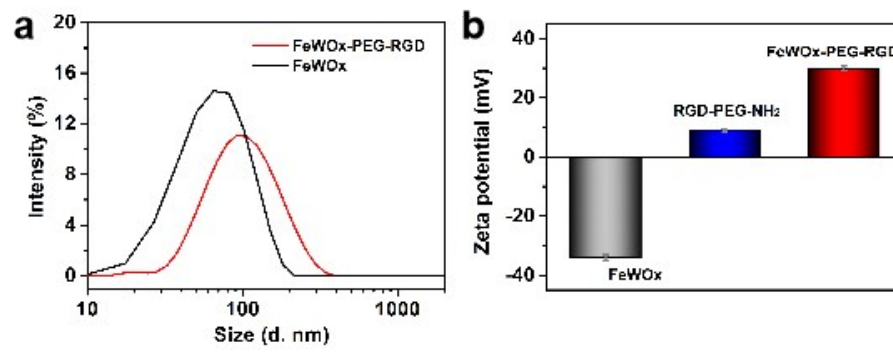

**Figure S2.** a) Dynamic light scattering (DLS) and b) zeta potential analysis of FeWO<sub>x</sub> NPs and FeWO<sub>x</sub>-PEG-RGD NPs.

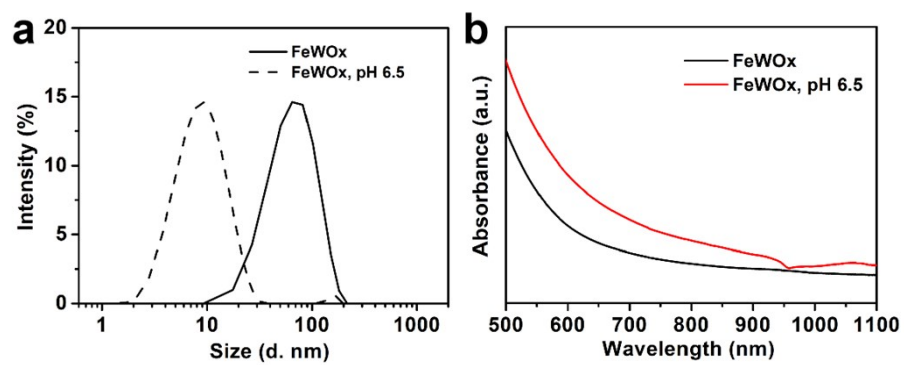

**Figure S3.** a) UV-vis absorption spectra of FeWO<sub>x</sub> NPs before and after treatment in mimic TME for 24 h. b) DLS of FeWO<sub>x</sub> NPs before and after treatment in mimic TME for 24 h.

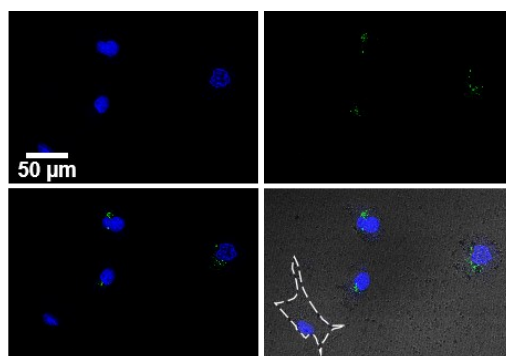

**Figure S4.** Confocal fluorescent microscopy images of FAM-labeled FeWO<sub>x</sub>-PEG-RGD after incubating with MCF-7/NHDF cell lines (green = FAM-labeled FeWO<sub>x</sub>-PEG-RGD, blue = nucleus; scale bar = 50 μm). The NHDF cells were surrounded by white boxes.

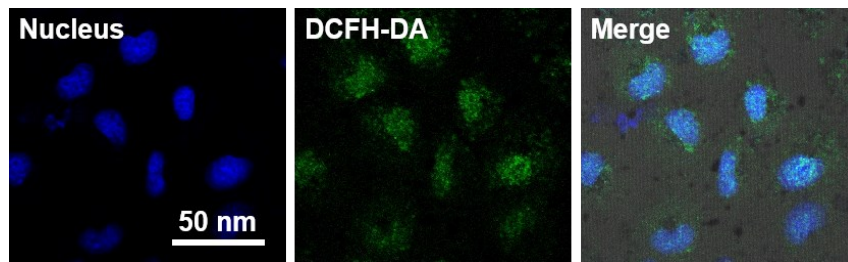

**Figure S5.** Confocal images of MCF-7 cells for intracellular ROS detection by ROS probe, DCFH-DA.

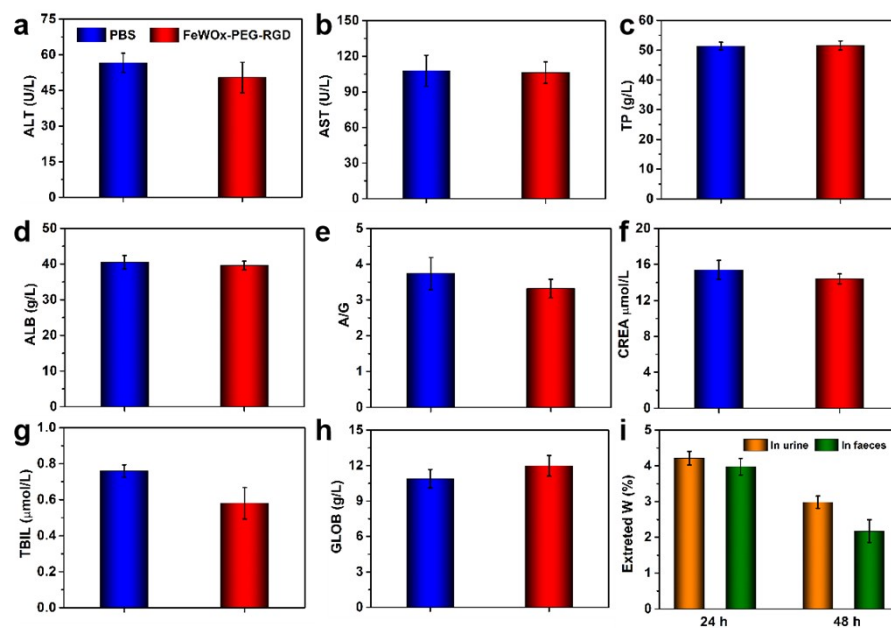

**Figure S6.** a-h) The serum biochemistry assay of FeWO<sub>x</sub>-PEG-RGD NPs treated mice at a dose of 20 mg kg<sup>-1</sup> after intravenous injection 48 h. i) Accumulated W (in urine and stool) excretion out of the mice body after the injection of FeWO<sub>x</sub>-PEG-RGD NPs through caudal vein for 24 h and 48 h.

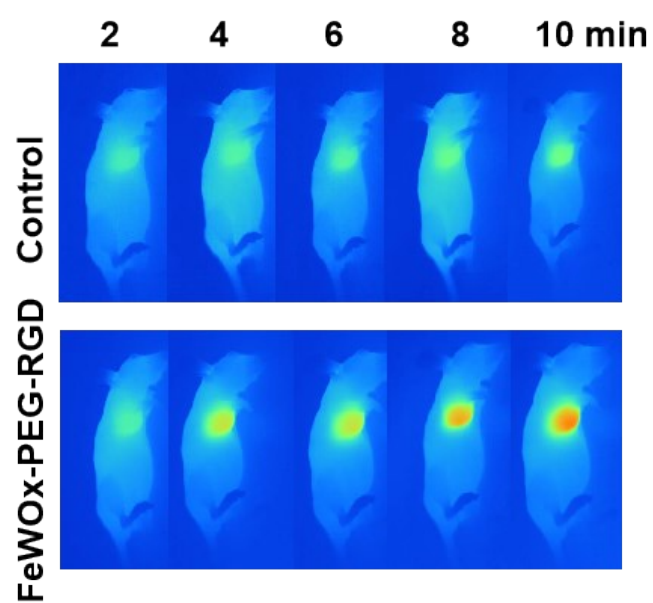

**Figure S7.** Infrared thermal images of tumor-bearing mice exposed to NIR laser (980 nm,  $0.72 \text{ W cm}^{-2}$ ) for 10 min after intravenously injected with PBS (control) or  $\text{FeWO}_x\text{-PEG-RGD}$  ( $20 \text{ mg kg}^{-1}$ ) for 24 h.

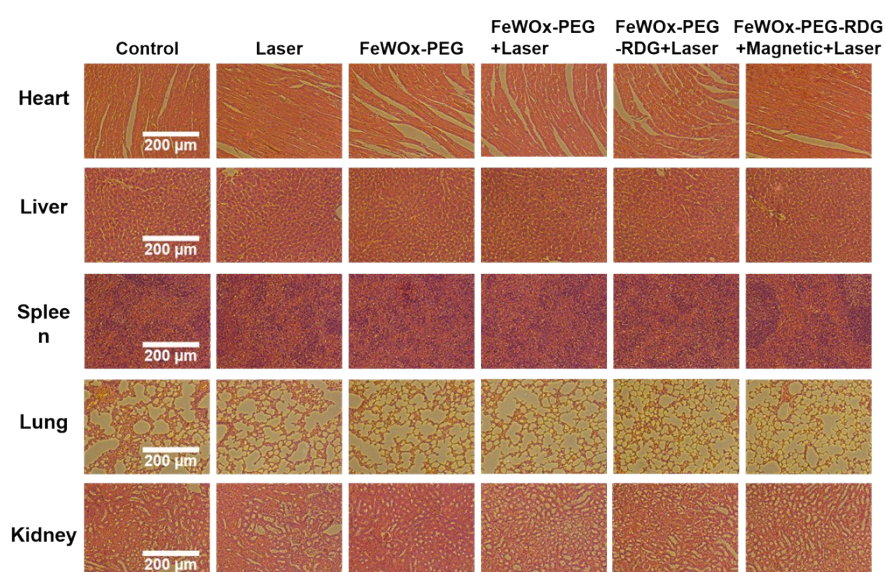

**Figure S8.** Histological data (H&E stained images) of the major organs (heart, liver, spleen, lung, and kidney) of mice received different treatments 16 days post injection (scale bars: 200  $\mu$ m).
